# Supplementary material
Source: HighWire-hosted journal article supplement (https://www.annfammed.org/highwire/filestream/8023/field_highwire_adjunct_files/0/Steiner_Supp_Fig.pdf)

Steiner BD, Denham AC, Ashkin E, Newton WP, Wroth T, Dobson LA. Community Care of North Carolina: improving care through community health networks . *Ann Fam Med.* 2008;6(4):361-367.

<http://www.annfammed.org/cgi/content/full/6/4/361/DC1>

**Supplemental Figure 1. Map of the expansion of Community Care of North Carolina Networks.**

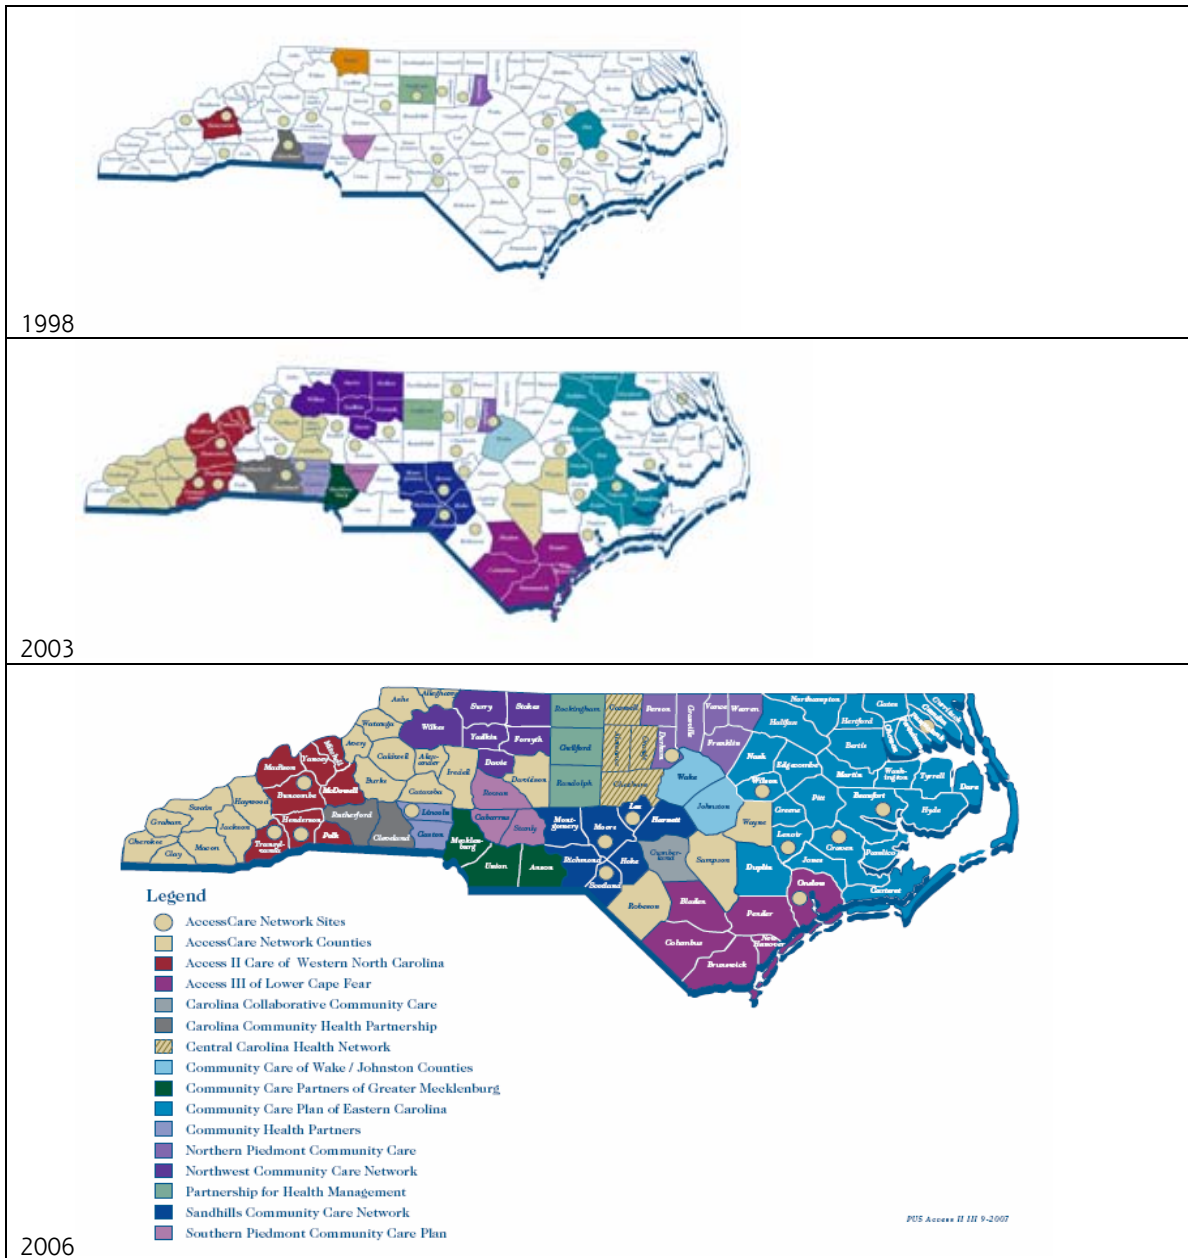

Supplement: Steiner_Supp_Fig.pdf [file Steiner_Supp_Fig.pdf]
